# Supplementary material for: Functionalization of CD36 cardiovascular disease and expression associated variants by interdisciplinary high throughput analysis
Source: PubMed Central journal article supplement (PMC6684090; doi:10.1371/journal.pgen.1008287), 2019-07-25
Supplement: pgen.1008287.s001.pdf [file pgen.1008287.s001.pdf]

**Table S1. Complete MPRA results of positive controls**

| Control | Transcription Shift | t-test    |           | u-test   |          | Bayesian Model |                       |
|---------|---------------------|-----------|-----------|----------|----------|----------------|-----------------------|
|         |                     | P-value   | Q-value   | P-value  | Q-value  | Posterior Mean | 95% Credible Interval |
| URUOS   | -2.55525            | 1.94E-131 | 1.76E-129 | 2.08E-38 | 1.89E-36 | -2.44298       | -2.616 : -2.267       |
| PKRRE5  | -1.00354            | 9.86E-73  | 4.49E-71  | 1.41E-37 | 6.40E-36 | -1.11463       | -1.282 : -0.944       |
| PKRRE3  | -0.87213            | 1.24E-71  | 3.77E-70  | 4.44E-37 | 1.35E-35 | -1.01771       | -1.183 : -0.848       |
| ALAS23  | -2.08592            | 8.95E-62  | 2.04E-60  | 5.82E-33 | 8.82E-32 | -2.00429       | -2.276 : -1.703       |
| ALAS22  | -2.413              | 2.53E-57  | 3.83E-56  | 1.11E-28 | 1.12E-27 | -2.48037       | -2.838 : -2.114       |
| ALAS21  | -2.10623            | 6.23E-57  | 8.10E-56  | 1.52E-32 | 1.97E-31 | -2.00922       | -2.33 : -1.699        |
| PKRRE4  | -0.89499            | 2.37E-56  | 2.70E-55  | 7.73E-36 | 1.76E-34 | -0.93448       | -1.097 : -0.769       |
| PKRRE1  | -0.69606            | 7.38E-39  | 7.46E-38  | 2.57E-30 | 2.92E-29 | -0.75478       | -0.924 : -0.59        |
| PKRRE2  | -0.26871            | 1.76E-06  | 1.45E-05  | 1.47E-08 | 1.34E-07 | -0.37922       | -0.698 : -0.055       |
| HBG2    | 0.06142             | 4.96E-01  | 7.28E-01  | 7.87E-01 | 8.97E-01 | -0.01277       | -0.231 : 0.214        |
