# Supplementary material for: Functionalization of CD36 cardiovascular disease and expression associated variants by interdisciplinary high throughput analysis
Source: PubMed Central journal article supplement (PMC6684090; doi:10.1371/journal.pgen.1008287), 2019-07-25
Supplement: pgen.1008287.s002.pdf [file pgen.1008287.s002.pdf]

**Table S2. Complete MPRA results of CD36 variants.**

| Control    | Transcription Shift | t-test   |          | u-test   |          | Bayesian Model |                       |
|------------|---------------------|----------|----------|----------|----------|----------------|-----------------------|
|            |                     | P-value  | Q-value  | P-value  | Q-value  | Posterior Mean | 95% Credible Interval |
| rs2366739  | -1.04532            | 6.87E-59 | 1.25E-57 | 1.41E-35 | 2.57E-34 | -1.13049       | -1.295 : -0.955       |
| rs940542   | -0.2785             | 2.56E-07 | 2.33E-06 | 6.51E-07 | 5.39E-06 | -0.29285       | -0.481 : -0.12        |
| rs1093831  | -0.273              | 1.07E-04 | 8.09E-04 | 7.70E-05 | 5.84E-04 | 0.10111        | -0.113 : 0.315        |
| rs6467258  | 0.22024             | 6.72E-03 | 4.37E-02 | 7.47E-04 | 5.23E-03 | -0.05448       | -0.259 : 0.16         |
| rs1194196  | -0.23346            | 1.21E-02 | 6.45E-02 | 1.07E-03 | 6.93E-03 | -0.08582       | -0.271 : 0.111        |
| rs11464747 | 0.36056             | 1.02E-03 | 7.16E-03 | 1.70E-03 | 1.03E-02 | 1.23996        | 0.962 : 1.518         |
| rs819456   | 0.31541             | 3.05E-02 | 1.32E-01 | 2.68E-03 | 1.52E-02 | 0.46373        | 0.079 : 0.861         |
| rs6961069  | 0.21993             | 1.14E-02 | 6.45E-02 | 2.90E-03 | 1.55E-02 | 0.01234        | -0.211 : 0.233        |
| rs819457   | 0.18773             | 1.58E-02 | 7.58E-02 | 3.07E-03 | 1.55E-02 | 0.14833        | -0.072 : 0.372        |
| rs28851188 | 0.20479             | 9.63E-03 | 5.84E-02 | 1.53E-02 | 6.94E-02 | 0.07836        | -0.132 : 0.282        |
| rs1761661  | -0.48586            | 1.51E-01 | 3.70E-01 | 1.47E-02 | 6.94E-02 | -0.44408       | -1.109 : 0.227        |
| rs1608671  | 0.2257              | 1.32E-02 | 6.69E-02 | 1.83E-02 | 7.91E-02 | 0.24244        | -0.001 : 0.463        |
| rs13233631 | 0.23128             | 6.44E-02 | 2.17E-01 | 2.29E-02 | 9.47E-02 | -0.03622       | -0.305 : 0.253        |
| rs819442   | -0.14388            | 1.59E-01 | 3.77E-01 | 2.45E-02 | 9.67E-02 | 0.05905        | -0.24 : 0.361         |
| rs819445   | -0.01314            | 9.05E-01 | 9.89E-01 | 3.11E-02 | 1.18E-01 | -0.02339       | -0.289 : 0.237        |
| rs1761667  | -0.18177            | 4.86E-02 | 1.84E-01 | 3.85E-02 | 1.40E-01 | -0.08644       | -0.315 : 0.148        |

|             |          |          |          |          |          |          |                 |
|-------------|----------|----------|----------|----------|----------|----------|-----------------|
| rs4626520   | 0.13624  | 6.17E-02 | 2.17E-01 | 4.96E-02 | 1.67E-01 | 0.02326  | -0.188 : 0.223  |
| rs2781841   | -0.1183  | 1.50E-01 | 3.70E-01 | 4.85E-02 | 1.67E-01 | -0.10839 | -0.332 : 0.128  |
| rs1851935   | 0.46972  | 2.08E-02 | 9.44E-02 | 5.60E-02 | 1.82E-01 | 0.58079  | 0.15 : 0.982    |
| rs2177616   | -0.09018 | 1.68E-01 | 3.82E-01 | 6.19E-02 | 1.94E-01 | -0.00484 | -0.188 : 0.191  |
| rs1194197   | 0.11786  | 1.07E-01 | 3.03E-01 | 7.32E-02 | 2.08E-01 | 0.12638  | -0.085 : 0.338  |
| rs4731643   | -0.15098 | 1.11E-01 | 3.05E-01 | 7.11E-02 | 2.08E-01 | -0.11007 | -0.36 : 0.128   |
| rs7810280   | -0.11062 | 3.32E-01 | 6.05E-01 | 7.19E-02 | 2.08E-01 | -0.22907 | -0.463 : 0.009  |
| rs10233710  | 0.16293  | 3.71E-02 | 1.53E-01 | 8.50E-02 | 2.34E-01 | 0.26916  | 0.051 : 0.485   |
| rs1194179   | 0.05632  | 4.24E-01 | 6.88E-01 | 9.44E-02 | 2.53E-01 | -0.14227 | -0.349 : 0.06   |
| rs1953298   | -0.07658 | 5.12E-01 | 7.39E-01 | 1.13E-01 | 2.95E-01 | -0.0912  | -0.372 : 0.176  |
| rs1093833   | 0.54135  | 1.04E-01 | 3.03E-01 | 1.23E-01 | 3.12E-01 | 1.00913  | 0.271 : 1.764   |
| rs2366855   | -0.04748 | 6.02E-01 | 8.05E-01 | 1.28E-01 | 3.15E-01 | -0.26947 | -0.505 : -0.034 |
| rs12155030  | 0.49526  | 3.87E-02 | 1.53E-01 | 1.43E-01 | 3.24E-01 | 0.21049  | -0.404 : 0.784  |
| rs3211821   | 0.15352  | 6.21E-02 | 2.17E-01 | 1.40E-01 | 3.24E-01 | 0.17309  | -0.052 : 0.38   |
| rs138369160 | 0.1948   | 8.07E-02 | 2.62E-01 | 1.46E-01 | 3.24E-01 | 0.31868  | 0.018 : 0.617   |
| rs17154155  | -0.13435 | 8.45E-02 | 2.65E-01 | 1.37E-01 | 3.24E-01 | -0.23316 | -0.449 : -0.009 |
| rs4728183   | 0.00832  | 9.30E-01 | 9.89E-01 | 1.50E-01 | 3.24E-01 | 0.01875  | -0.223 : 0.266  |
| rs34592988  | 0.07016  | 4.06E-01 | 6.73E-01 | 1.55E-01 | 3.29E-01 | 0.0955   | -0.119 : 0.308  |
| rs819436    | 0.11231  | 3.14E-01 | 5.95E-01 | 1.75E-01 | 3.61E-01 | 0.16837  | -0.111 : 0.458  |
| rs9649532   | 0.12441  | 3.66E-01 | 6.28E-01 | 1.94E-01 | 3.92E-01 | 0.0279   | -0.34 : 0.4     |

|            |          |          |          |          |          |          |                 |
|------------|----------|----------|----------|----------|----------|----------|-----------------|
| rs3211842  | 0.09516  | 1.32E-01 | 3.55E-01 | 2.17E-01 | 4.21E-01 | 0.24792  | 0.042 : 0.445   |
| rs1194177  | -0.01999 | 8.35E-01 | 9.75E-01 | 2.16E-01 | 4.21E-01 | -0.33384 | -0.573 : -0.086 |
| rs28854232 | -0.01207 | 8.93E-01 | 9.89E-01 | 2.24E-01 | 4.25E-01 | -0.06846 | -0.295 : 0.152  |
| rs1761662  | -0.10311 | 2.55E-01 | 5.51E-01 | 2.31E-01 | 4.28E-01 | -0.0865  | -0.33 : 0.161   |
| rs1049654  | -0.12294 | 1.62E-01 | 3.77E-01 | 2.72E-01 | 4.88E-01 | -0.07185 | -0.299 : 0.16   |
| rs1851934  | 0.09629  | 4.03E-01 | 6.73E-01 | 2.73E-01 | 4.88E-01 | 0.40852  | 0.138 : 0.684   |
| rs1320408  | 0.06631  | 2.66E-01 | 5.62E-01 | 2.85E-01 | 4.90E-01 | -0.0141  | -0.207 : 0.173  |
| rs1761645  | -0.02737 | 7.51E-01 | 9.14E-01 | 2.85E-01 | 4.90E-01 | -0.23063 | -0.459 : -0.012 |
| rs1093829  | 0.12957  | 1.48E-01 | 3.70E-01 | 3.23E-01 | 5.16E-01 | 0.11022  | -0.115 : 0.35   |
| rs1761646  | 0.08586  | 2.86E-01 | 5.75E-01 | 3.10E-01 | 5.16E-01 | 0.14086  | -0.064 : 0.371  |
| rs4316098  | 0.07598  | 4.62E-01 | 7.08E-01 | 3.19E-01 | 5.16E-01 | 0.10976  | -0.145 : 0.356  |
| rs1953299  | 0.0382   | 6.67E-01 | 8.74E-01 | 3.21E-01 | 5.16E-01 | -0.5241  | -0.742 : -0.308 |
| rs9649527  | 0.06096  | 4.33E-01 | 6.92E-01 | 3.34E-01 | 5.24E-01 | -0.23275 | -0.485 : 0.014  |
| rs11770358 | 0.15989  | 2.91E-01 | 5.75E-01 | 3.44E-01 | 5.31E-01 | 0.13013  | -0.193 : 0.463  |
| rs1093830  | -0.00965 | 8.35E-01 | 9.75E-01 | 3.65E-01 | 5.53E-01 | -0.0652  | -0.239 : 0.118  |
| rs819460   | 0.14181  | 2.72E-01 | 5.63E-01 | 3.72E-01 | 5.55E-01 | 0.15343  | -0.127 : 0.427  |
| rs1194182  | -0.2146  | 9.11E-02 | 2.76E-01 | 4.08E-01 | 5.89E-01 | -0.33051 | -0.6 : -0.05    |
| rs1761673  | 0.03448  | 7.63E-01 | 9.14E-01 | 4.08E-01 | 5.89E-01 | 0.11188  | -0.133 : 0.356  |
| rs7793698  | 0.04443  | 7.36E-01 | 9.14E-01 | 4.29E-01 | 6.09E-01 | -0.02528 | -0.334 : 0.286  |
| rs13236689 | 0.09468  | 3.04E-01 | 5.89E-01 | 4.91E-01 | 6.87E-01 | 0.03031  | -0.207 : 0.262  |

|                |          |          |          |          |          |          |                 |
|----------------|----------|----------|----------|----------|----------|----------|-----------------|
| rs1093834      | -0.00567 | 9.20E-01 | 9.89E-01 | 5.05E-01 | 6.96E-01 | 0.15143  | -0.051 : 0.35   |
| rs6467251      | 0.17471  | 4.67E-01 | 7.08E-01 | 6.15E-01 | 8.36E-01 | -0.03797 | -0.526 : 0.432  |
| rs701269       | 0.08099  | 3.24E-01 | 6.01E-01 | 6.55E-01 | 8.46E-01 | -0.28239 | -0.522 : -0.045 |
| rs34736275     | -0.02584 | 6.72E-01 | 8.74E-01 | 6.53E-01 | 8.46E-01 | 0.02446  | -0.157 : 0.212  |
| rs819455       | 0.00715  | 9.37E-01 | 9.89E-01 | 6.60E-01 | 8.46E-01 | 0.00605  | -0.23 : 0.231   |
| rs7794010      | -0.00445 | 9.53E-01 | 9.89E-01 | 6.53E-01 | 8.46E-01 | 0.24392  | 0.018 : 0.468   |
| rs1527479      | 0.15073  | 2.47E-01 | 5.49E-01 | 7.24E-01 | 8.71E-01 | 0.13982  | -0.109 : 0.389  |
| rs12706912     | 0.10766  | 3.43E-01 | 6.12E-01 | 6.97E-01 | 8.71E-01 | -0.08802 | -0.336 : 0.168  |
| rs1537477      | 0.02838  | 5.91E-01 | 8.02E-01 | 7.37E-01 | 8.71E-01 | 0.05378  | -0.139 : 0.237  |
| rs1194178      | 0.02119  | 8.72E-01 | 9.89E-01 | 7.25E-01 | 8.71E-01 | 0.15633  | -0.149 : 0.443  |
| rs1054516      | -0.0088  | 8.97E-01 | 9.89E-01 | 7.12E-01 | 8.71E-01 | 0.01406  | -0.188 : 0.212  |
| rs2366744      | -0.00327 | 9.57E-01 | 9.89E-01 | 7.36E-01 | 8.71E-01 | -0.09881 | -0.285 : 0.093  |
| rs819444       | 0.03194  | 6.87E-01 | 8.80E-01 | 7.55E-01 | 8.81E-01 | 0.02406  | -0.266 : 0.319  |
| rs1194195      | -0.082   | 4.59E-01 | 7.08E-01 | 8.18E-01 | 8.97E-01 | -0.11836 | -0.359 : 0.126  |
| rs1093835      | -0.03549 | 5.52E-01 | 7.64E-01 | 8.02E-01 | 8.97E-01 | -0.0405  | -0.22 : 0.134   |
| rs3212160      | 0.04682  | 5.54E-01 | 7.64E-01 | 8.10E-01 | 8.97E-01 | 0.01562  | -0.196 : 0.232  |
| rs819443       | -0.00145 | 9.89E-01 | 9.89E-01 | 8.14E-01 | 8.97E-01 | -0.09974 | -0.433 : 0.226  |
| rs6961024      | 0.0029   | 9.72E-01 | 9.89E-01 | 8.49E-01 | 9.19E-01 | 0.26364  | 0.068 : 0.472   |
| rs10499859     | 0.09846  | 3.50E-01 | 6.13E-01 | 8.90E-01 | 9.30E-01 | 0.16667  | -0.075 : 0.423  |
| rs17154155_ALT | -0.04608 | 4.96E-01 | 7.28E-01 | 8.85E-01 | 9.30E-01 | 0.08127  | -0.122 : 0.284  |

|            |          |          |          |          |          |          |                |
|------------|----------|----------|----------|----------|----------|----------|----------------|
| rs1404312  | -0.04521 | 7.15E-01 | 9.03E-01 | 8.72E-01 | 9.30E-01 | -0.19578 | -0.454 : 0.064 |
| rs35660939 | -0.06731 | 5.31E-01 | 7.54E-01 | 9.58E-01 | 9.69E-01 | -0.09644 | -0.37 : 0.167  |
| rs11771152 | -0.00454 | 9.64E-01 | 9.89E-01 | 9.48E-01 | 9.69E-01 | -0.00632 | -0.267 : 0.256 |
| rs11770907 | -0.00199 | 9.83E-01 | 9.89E-01 | 9.37E-01 | 9.69E-01 | 0.03896  | -0.211 : 0.292 |
| rs9649529  | -0.01129 | 7.63E-01 | 9.14E-01 | 9.90E-01 | 9.90E-01 | -0.05748 | -0.237 : 0.128 |
