# Supplementary material for: Functionalization of CD36 cardiovascular disease and expression associated variants by interdisciplinary high throughput analysis
Source: PubMed Central journal article supplement (PMC6684090; doi:10.1371/journal.pgen.1008287), 2019-07-25
Supplement: pgen.1008287.s003.pdf [file pgen.1008287.s003.pdf]

**Table S3: Sequences of MPRA Controls**

| Gene  | Type | Sequence                                                                                                                                                    |
|-------|------|-------------------------------------------------------------------------------------------------------------------------------------------------------------|
| PKRRE | Ref  | AGGAAATGCCAGGAGATGAGGGCAGAGAGCAGGCCGTTCTGGGGGAGGGATTCTGTGGGGACAGGGTGGCCTACTGG<br>GTGTGCCCCCTTTTCTCTTCTCTGTCTCCCTTAGATAAGACCAGCAGTTTTGTCATCCTCTCCCTCTCATTCCA |
| PKRRE | Mut  | AGGAAATGCCAGGAGATGAGGGCAGAGAGCAGGCCGTTCTGGGGGAGGGATTCTGTGGGGACAGGGTGGCCTACTGG<br>GTGTGCCCCCTTTTCTCTTATCTGTCTCCCTTAGATAAGACCAGCAGTTTTGTCATCCTCTCCCTCTCATTCCA |
| PKRRE | Ref  | AGGAAATGCCAGGAGATGAGGGCAGAGAGCAGGCCGTTCTGGGGGAGGGATTCTGTGGGGACAGGGTGGCCTACTGG<br>GTGTGCCCCCTTTTCTCTTCTCTGTCTCCCTTAGATAAGACCAGCAGTTTTGTCATCCTCTCCCTCTCATTCCA |
| PKRRE | Mut  | AGGAAATGCCAGGAGATGAGGGCAGAGAGCAGGCCGTTCTGGGGGAGGGATTCTGTGGGGACAGGGTGGCCTACTGG<br>GTGTGCCCCCTTTTCTCTTCGCTGTCTCCCTTAGATAAGACCAGCAGTTTTGTCATCCTCTCCCTCTCATTCCA |
| PKRRE | Ref  | AGGAAATGCCAGGAGATGAGGGCAGAGAGCAGGCCGTTCTGGGGGAGGGATTCTGTGGGGACAGGGTGGCCTACTGG<br>GTGTGCCCCCTTTTCTCTTCTCTGTCTCCCTTAGATAAGACCAGCAGTTTTGTCATCCTCTCCCTCTCATTCCA |
| PKRRE | Mut  | AGGAAATGCCAGGAGATGAGGGCAGAGAGCAGGCCGTTCTGGGGGAGGGATTCTGTGGGGACAGGGTGGCCTACTGG<br>GTGTGCCCCCTTTTCTCTTCTATGTCTCCCTTAGATAAGACCAGCAGTTTTGTCATCCTCTCCCTCTCATTCCA |
| PKRRE | Ref  | AGGAAATGCCAGGAGATGAGGGCAGAGAGCAGGCCGTTCTGGGGGAGGGATTCTGTGGGGACAGGGTGGCCTACTGG<br>GTGTGCCCCCTTTTCTCTTCTCTGTCTCCCTTAGATAAGACCAGCAGTTTTGTCATCCTCTCCCTCTCATTCCA |
| PKRRE | Mut  | AGGAAATGCCAGGAGATGAGGGCAGAGAGCAGGCCGTTCTGGGGGAGGGATTCTGTGGGGACAGGGTGGCCTACTGG<br>GTGTGCCCCCTTTTCTCTTCTCGGTCTCCCTTAGATAAGACCAGCAGTTTTGTCATCCTCTCCCTCTCATTCCA |
| PKRRE | Ref  | AGGAAATGCCAGGAGATGAGGGCAGAGAGCAGGCCGTTCTGGGGGAGGGATTCTGTGGGGACAGGGTGGCCTACTGG<br>GTGTGCCCCCTTTTCTCTTCTCTGTCTCCCTTAGATAAGACCAGCAGTTTTGTCATCCTCTCCCTCTCATTCCA |
| PKRRE | Mut  | AGGAAATGCCAGGAGATGAGGGCAGAGAGCAGGCCGTTCTGGGGGAGGGATTCTGTGGGGACAGGGTGGCCTACTGG<br>GTGTGCCCCCTTTTCTCTTCTCTCTCTCCCTTAGATAAGACCAGCAGTTTTGTCATCCTCTCCCTCTCATTCCA |
| ALAS2 | Ref  | CTGGAGATATGTGTTTCCCTTCCCCTGCCTGCTTGTGAAAGCTAAAGCACTTGGGGCTGAGCCTGCAGACCACAGATAA<br>AGTTGCCAGAGTTTATCGCCATTGGGGTCTGACCACTCCCCAAGCTGAGACCAGGGCGTGGGAGAGAAGAG  |
| ALAS2 | Mut  | CTGGAGATATGTGTTTCCCTTCCCCTGCCTGCTTGTGAAAGCTAAAGCACTTGGGGCTGAGCCTGCAGACCACACATAA<br>AGTTGCCAGAGTTTATCGCCATTGGGGTCTGACCACTCCCCAAGCTGAGACCAGGGCGTGGGAGAGAAGAG  |
| ALAS2 | Ref  | TGGAGATATGTGTTTCCCTTCCCCTGCCTGCTTGTGAAAGCTAAAGCACTTGGGGCTGAGCCTGCAGACCACAGATAAA<br>GTTGCCAGAGTTTATCGCCATTGGGGTCTGACCACTCCCCAAGCTGAGACCAGGGCGTGGGAGAGAAGAGG  |
| ALAS2 | Mut  | TGGAGATATGTGTTTCCCTTCCCCTGCCTGCTTGTGAAAGCTAAAGCACTTGGGGCTGAGCCTGCAGACCACAGGTA<br>GTTGCCAGAGTTTATCGCCATTGGGGTCTGACCACTCCCCAAGCTGAGACCAGGGCGTGGGAGAGAAGAGG    |
| ALAS2 | Ref  | GGAGATATGTGTTTCCCTTCCCCTGCCTGCTTGTGAAAGCTAAAGCACTTGGGGCTGAGCCTGCAGACCACAGATAAAG<br>TTGCCAGAGTTTATCGCCATTGGGGTCTGACCACTCCCCAAGCTGAGACCAGGGCGTGGGAGAGAAGAGGA  |
| ALAS2 | Mut  | GGAGATATGTGTTTCCCTTCCCCTGCCTGCTTGTGAAAGCTAAAGCACTTGGGGCTGAGCCTGCAGACCACAGACAAAG<br>TTGCCAGAGTTTATCGCCATTGGGGTCTGACCACTCCCCAAGCTGAGACCAGGGCGTGGGAGAGAAGAGGA  |
| UROS  | Ref  | TGGAAGAGACCTATCCCTCCTACACCATGACTTAGCACTAATGGGCTTGTCTTTTCTGAAGACCCCTGTCACTGATAAGG<br>CCAAGAAAGAGCATGTTAGCAGTTGATATCACTTGGAAAGACAGATGAAACCATTAGTGAAGCCAAGTG   |

|      |     |                                                                                                                                                           |
|------|-----|-----------------------------------------------------------------------------------------------------------------------------------------------------------|
| UROS | Mut | TGGAAGAGACCTATCCCTCCTACACCATGACTTAGCACTAATGGGCTTGTTCTTTCTGAAGACCCCTGTCACTGGTAAGG<br>CCAAGAAAGAGCATGTTAGCAGTTGATATCACTTGAAAGACAGATGAAACCATTAGTGAAAGCCAAGTG |
| SPI1 | Ref | GTTGTTTAAAATTTTCTCTGAGACACGACGTTCTCCTACCTAACTCTTATTGAAATGAACAAAAACCCTCCTCCAATTACC<br>CACCTCCCCACTCTCCCCTCTAGACTAAATGTATGCCTGAACTCTGAGGGTTCGGTCATGGGGCCCA  |
| SPI1 | Mut | GTTGTTTAAAATTTTCTCTGAGACACGACGTTCTCCTACCTAACTCTTATTGAAATGAACAAAAACCCTCCTCTAATTACC<br>CACCTCCCCACTCTCCCCTCTAGACTAAATGTATGCCTGAACTCTGAGGGTTCGGTCATGGGGCCCA  |
| HBG2 | Ref | TAAACATTAATCTATTCCTGCACTGAACTGTTGCTTTATAGGATTTTTCACTACACTAATGAGAACTTAAGAGATAATGGCC<br>TAAAACACAGAGAGTATATTCAAAGATAAGTATAGCACTTCTTATTTGGAAACCAATGCTTACTAAA |
| HBG2 | Mut | TAAACATTAATCTATTCCTGCACTGAACTGTTGCTTTATAGGATTTTTCACTACACTAATGAGAACTTAAGAGAGAATGGC<br>CTAAAACACAGAGAGTATATTCAAAGATAAGTATAGCACTTCTTATTTGGAAACCAATGCTTACTAAA |
