# Supplementary material for: Functionalization of CD36 cardiovascular disease and expression associated variants by interdisciplinary high throughput analysis
Source: PubMed Central journal article supplement (PMC6684090; doi:10.1371/journal.pgen.1008287), 2019-07-25
Supplement: pgen.1008287.s004.pdf [file pgen.1008287.s004.pdf]

**Table S4: RNA-Seq Quality**

| <b>Sample</b> | <b>Sample Depth</b> | <b>Number of Reads</b> | <b>Fraction Usable Reads</b> | <b>Fraction 0-count barcodes</b> |
|---------------|---------------------|------------------------|------------------------------|----------------------------------|
| cDNA1         | 1891321             | 2739571                | 0.69                         | 0.09                             |
| cDNA2         | 2967012             | 4109045                | 0.72                         | 0.09                             |
| cDNA3         | 1577854             | 2242279                | 0.70                         | 0.12                             |
| Plasmid1      | 1968644             | 2757765                | 0.71                         | 0.07                             |
| Plasmid2      | 3023219             | 4342543                | 0.70                         | 0.06                             |
