# Supplementary material for: Functionalization of CD36 cardiovascular disease and expression associated variants by interdisciplinary high throughput analysis
Source: PubMed Central journal article supplement (PMC6684090; doi:10.1371/journal.pgen.1008287), 2019-07-25
Supplement: pgen.1008287.s005.pdf [file pgen.1008287.s005.pdf]

**Table S5. Sequences generated for luciferase assays.**

| SNP-genotype                 | Sequence*                                                                                              |
|------------------------------|--------------------------------------------------------------------------------------------------------|
| rs1093833 T (Ref)            | GCAGCAGCCACAACCAAGTG <b>T</b> TAGTGGGTATAGGGGTGCC                                                      |
| rs1093833 C (Alt)            | GCAGCAGCCACAACCAAGTG <b>C</b> TAGTGGGTATAGGGGTGCC                                                      |
| rs7810280 G (Ref)            | AATCAACCAAGATGATTTAC <b>G</b> GGTCAAAGTATTATAGTGT                                                      |
| rs7810280 A (Alt)            | AATCAACCAAGATGATTTAC <b>A</b> GGTCAAAGTATTATAGTGT                                                      |
| rs819456 T (Ref)             | TGCTGTTCTTGTAATAGTGA <b>T</b> TGGGTCTCATGAAATCTGA                                                      |
| rs819456 A (Alt)             | TGCTGTTCTTGTAATAGTGA <b>A</b> TGGGTCTCATGAAATCTGA                                                      |
| rs940542T (Ref)              | TTTAACTGAATTTTTAATGT <b>T</b> GTTAACTGAGATAAGTGAA                                                      |
| Rs940542 C (Alt)             | TTTAACTGAATTTTTAATGT <b>C</b> GTTAACTGAGATAAGTGAA                                                      |
| rs2366739+rs1194196 TA (Ref) | TCCCATGCTGTTCTTGTAATAGTGA <b>T</b> TGGGTCTCATGAAATCTGATGTTTTTA <b>A</b> AAACGG<br>GAGTTTCTCTGAACAGTCTC |
| rs2366739+rs1194196 CT (Alt) | TCCCATGCTGTTCTTGTAATAGTGA <b>C</b> TGGGTCTCATGAAATCTGATGTTTTTA <b>T</b> AAACGG<br>GAGTTTCTCTGAACAGTCTC |

\*Variant is in red
