# Supplementary material for: Functionalization of CD36 cardiovascular disease and expression associated variants by interdisciplinary high throughput analysis
Source: PubMed Central journal article supplement (PMC6684090; doi:10.1371/journal.pgen.1008287), 2019-07-25
Supplement: pgen.1008287.s006.pdf [file pgen.1008287.s006.pdf]

**A****CD36 MPRA - Bayesian Analysis Hits, Test SNPs**

Points are activity measurements, Violins are posteriors on mean activity

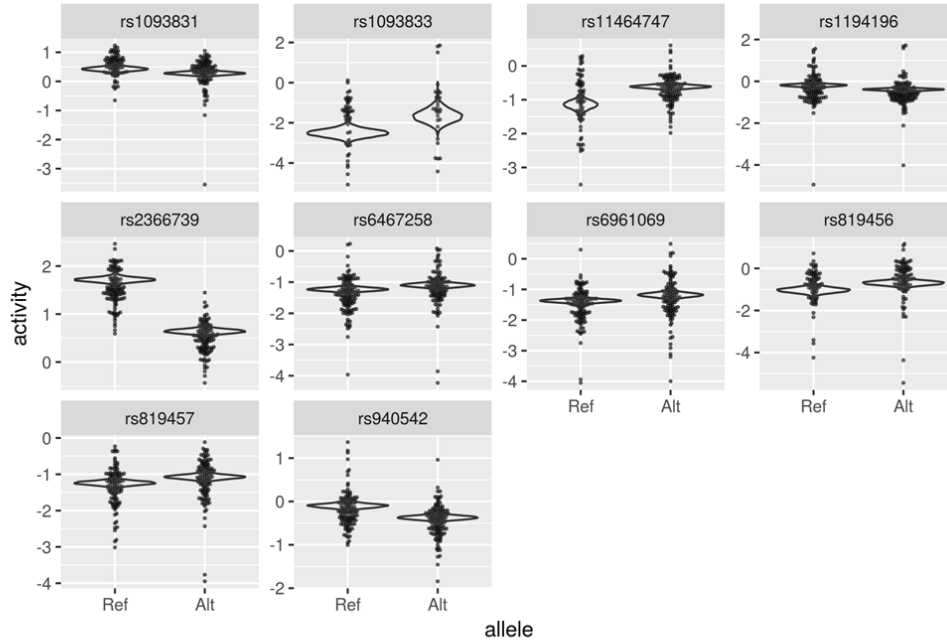**B****CD36 MPRA - Bayesian Analysis Hits, Functional Control SNPs**

Points are activity measurements, Violins are posteriors on mean activity

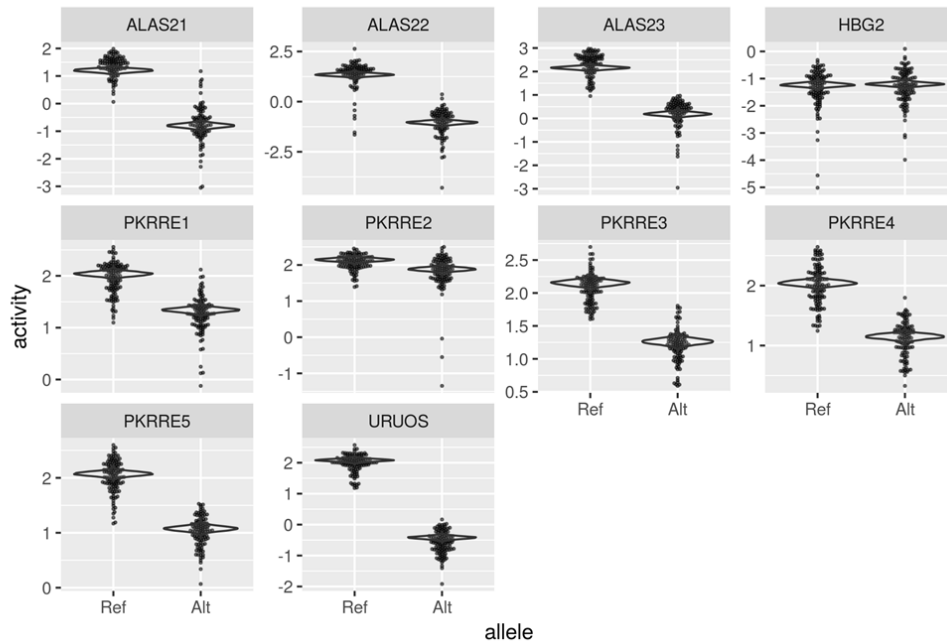

**Figure S1 – Combined activity scatterplots and posterior plots:** Points show activity measurements for individual barcodes, while violins show the posterior on the mean activity level for each allele from the Bayesian model for (A) the detected functional test SNPs and (B) the Controls.
