# Supplementary material for: Functionalization of CD36 cardiovascular disease and expression associated variants by interdisciplinary high throughput analysis
Source: PubMed Central journal article supplement (PMC6684090; doi:10.1371/journal.pgen.1008287), 2019-07-25
Supplement: pgen.1008287.s009.pdf [file pgen.1008287.s009.pdf]

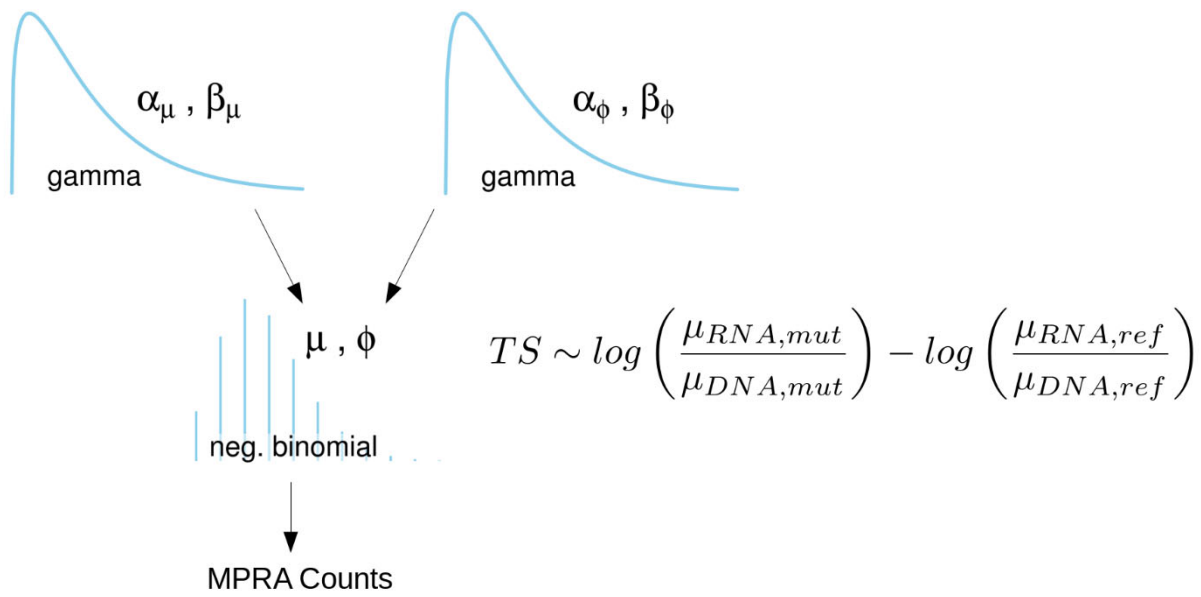

**Figure S4 – Kruschke diagram showing the generative model underlying the Bayesian analysis.** The mean parameters for the separate alleles and nucleic acids are aggregated after fitting the model into a posterior on transcription shift that is used to identify functional SNPs.
